# Supplementary material for: Atmospheric Evolution of Emissions from a Boreal Forest Fire: The Formation of Highly-Functionalized Oxygen-, Nitrogen-, and Sulfur-Containing Compounds
Source: Copernicus journal article supplement (doi:10.5194/acp-2020-619), 2020-07-06
Supplement: Supplementary file 1 [file acp-2020-619-supplement.pdf]

Supporting Information:

**Atmospheric Evolution of Emissions from a Boreal Forest Fire: The Formation of Highly-  
Functionalized Oxygen-, Nitrogen-, and Sulfur-Containing Compounds**

Jenna C. Ditto<sup>1</sup>, Megan He<sup>1</sup>, Tori N. Hass-Mitchell<sup>1</sup>, Samar G. Moussa<sup>2</sup>, Katherine Hayden<sup>2</sup>,  
Shao-Meng Li<sup>2</sup>, John Liggi<sup>2</sup>, Amy Leithead<sup>2</sup>, Patrick Lee<sup>2</sup>, Michael J. Wheeler<sup>2</sup>,  
Jeremy J.B. Wenzell<sup>2</sup>, Drew R. Gentner<sup>1,3,\*</sup>

<sup>1</sup> Department of Chemical and Environmental Engineering, Yale University, New Haven, CT, 06511, USA; <sup>2</sup> Air Quality Research Division, Environment and Climate Change Canada, Toronto, Ontario M3H 5T4, Canada; <sup>3</sup> Solutions for Energy, Air, Climate and Health (SEARCH), School of the Environment, Yale University, New Haven CT 0651, USA

\* Correspondence to: [drew.gentner@yale.edu](mailto:drew.gentner@yale.edu)

## S1. Supporting sample collection details

The gas- and particle-phase samples discussed here were collected alongside a variety of other measurements including trace gas mixing ratios (e.g. NO<sub>x</sub>, O<sub>3</sub>, CO, CO<sub>2</sub>, CH<sub>4</sub>, NH<sub>3</sub>), black carbon concentrations, and gas- and particle-phase chemical characterization via online mass spectrometry. Carbon monoxide mixing ratios, select gas-phase tracer mixing ratios from PTR-ToF-MS, and AMS organic aerosol (OA) concentrations were used as supporting data in this study.

Carbon monoxide mixing ratios were measured with a Picarro G2401 analyzer every 2 seconds during the flights. When absolute ion abundances from adsorbent tube or filter data were used to discuss chemical transformations with plume age, abundances were normalized by the total carbon monoxide mass observed during the corresponding adsorbent tube or filter sampling period.

A proton transfer reaction time-of-flight mass spectrometer (PTR-ToF-MS, Ionicon Analytik GmbH, Austria) was installed on the aircraft and collected measurements of volatile organic compounds (VOCs) with a time resolution of 1 second during the flights. The PTR-ToF-MS used a proton transfer reaction with H<sub>3</sub>O<sup>+</sup> as the primary reagent ion. VOCs were separated according to their mass to charge ( $m/z$ ) ratio and detected using a high resolution time-of-flight mass spectrometer. The data were processed using the TOFWARE software (Tofwerk AG). Additional details on these methods can be found in past work (Li et al., 2017).

A high resolution aerosol mass spectrometer (AMS, Aerodyne Inc) was used to measure mass concentrations of organics, NO<sub>3</sub>, SO<sub>4</sub> and NH<sub>4</sub> (only organics are discussed here). Using an aerodynamic lens, particles were sampled into a region of low vacuum where they impacted a heated surface (600°C), were vaporized, and then ionized by 70 eV impaction. Ions were then

detected with a time-of-flight mass spectrometer. The AMS was operated in V mode with 10 second time resolution. A collection efficiency of 0.5 was determined and applied to the data.

SI.1. Adsorbent tubes: Combined gas- and particle-phase samples were collected on adsorbent tubes using a novel wing pod sampler (Figure S2) and integrated across a set of low and high altitudes in screens 1-4 (Figure S1, Table S1). The wing pod (a standard PMS canister) contained multiple adsorbent tubes, selection valves, a flow meter, a pump, and control and data acquisition electronics. The wing pod sample inlet consisted of a 7" long Teflon tube (1/8" diameter), connected to an inlet manifold for distribution to multiple installed adsorbent tubes (Figure S2). The small length of Teflon inlet tubing and manifold were designed as the only upstream components to have potential contact with the air sample before it entered the adsorbent tubes (residence time ~0.3 seconds). The inlet manifold was heated to slightly above ambient temperature, with temperature monitored by the control software. Solenoid valves were positioned downstream from each adsorbent tube to remotely switch the air flow through any one single tube at a time. Air was drawn through the selected tube by a small DC pump with an orifice and mass flow meter (Alicat Scientific) regulating and monitoring flow. A temperature/pressure sensor were attached on the inlet manifold, for monitoring the thermophysical properties of sampled air. All flows, valve positions, temperatures, and pressures were recorded using a data acquisition board (LabJack T7) integrated into the pod. Communications with the pod were performed via the aircraft's internal Ethernet network using custom LabVIEW software. This remote access allowed sampling to be triggered by an operator in flight, while minimizing the amount of sample inlet needed to supply ambient air to the adsorbent tubes.

The total adsorbent tube sampling times ranged from 4-52 minutes (depending on the time required to complete a set of transects) at an average flow rate of 285 sccm, yielding a total sample volume of ~1-15 L. These sampling times and flow rates were similar to those tested extensively in past work with the same adsorbent tubes (e.g. 6-25 L at 125-250 sccm (Sheu et al., 2018)), though the slightly higher flow rate in our study was verified to ensure minimal analyte breakthrough. VOCs from a mixture of C<sub>6</sub>-C<sub>13</sub> species were used (hydrocarbons and functionalized species from a multicomponent gas-cylinder mixture (Apel-Riemer)), consistent with past breakthrough testing with these same adsorbent tubes (Sheu et al., 2018). Our results showed good retention when adsorbent tubes were tested at 300 sccm for 15 up to 60 minutes (7% loss on average), with some loss of C<sub>6</sub>-C<sub>9</sub> compounds at longer sampling times (13% loss on average). Therefore, this study was focused on hydrocarbons and functionalized species C<sub>10</sub> and larger, to ensure that compounds had similar or lower volatility than the breakthrough test analyte sets, and thus similar or greater retention in the adsorbent tubes during field sampling.

To reduce any background contamination in subsequent data analyses, field blank adsorbent tubes were collected throughout the campaign by installing adsorbent tubes in the wing pod sampler during flight with no air flow. All adsorbent tubes were stored with 1/4" brass Swagelok caps in a -30°C freezer before analysis.

*SI.2. Filters:* Particles were sampled through a forward-facing isokinetic stainless steel diffuser inlet (DMT) mounted on the roof of the aircraft. Particles approximately <2.5 µm were expected to be transmitted through this sampling setup based on transmission efficiency calculations using inlet dimensions and volume flow rates. Particles were collected onto PTFE filters using a multi-filter holder assembly mounted in the cabin of the aircraft. Filter sampling times ranged from 29-

101 minutes, at an average flow rate of 46 L/min. One filter sample was collected per screen for screens 1-5 (Figure S1, Table S1).

Similar to adsorbent tube methods, filter field blanks were collected throughout the campaign by installing filters in the sampler with no air flow. Filters were stored in closed sterile petri dishes in a -30°C freezer before analysis.

## S2. Supporting analytical methods details

S2.1. Adsorbent tubes: Adsorbent tubes were run on a GERSTEL Thermal Desorber TD 3.5+, with a 6 minute dry purge at 100 mL/min helium flow at 35°C to eliminate excess water trapped on the tubes, followed by a 10 minute desorption at 310°C, trapping desorbed analytes in the GERSTEL Cooled Injection System (CIS) at -100°C. Tubes were spiked with a range of standards (the multicomponent gas cylinder mixture discussed above, in addition to a set of functionalized liquid standards with a range of oxygen-, nitrogen-, and sulfur-containing functional groups from Sigma Aldrich and AccuStandard (Ditto et al., 2018, 2020)) to evaluate possible losses associated with dry purging. While some losses of higher volatility compounds were observed as expected (Ochiai et al., 2014), analytes generally showed good retention (~86% retained on average) during this preparatory step (Figure S4). CIS contents were subsequently desorbed at 325°C onto a DB5-MS-UI GC column (30 m x 320 µm x 0.25 µm). The column was held at 35°C for 5 minutes, followed by a 10°C/minute ramp to 325°C, and a 3-minute hold at 325°C. Helium carrier gas flowed through the column at 1.5 mL/min. The APCI source was operated in positive mode and the Q-TOF was operated in MS mode, following methods in past work (Khare et al., 2019).

Daily system check standards were run with adsorbent tube samples, including diluted diesel fuel (#2 diesel fuel from AccuStandard, DRO-AK-102-LCS-10X-R1) to confirm calibration and transmission of a complex hydrocarbon mixture through the analytical system, along with a mixture of hydrocarbons and functionalized species from the multicomponent gas cylinder mixture discussed above (Sheu et al., 2018). NIST Reference Gulf of Mexico 2779 Macondo Crude Oil was also run for response factor mass calibrations across the analyte range of interest, discussed in Section S3 (Khare et al., 2019).

S2.2 Filters: Filters were extracted in methanol with 60 minutes of sonication, and solvent was evaporated down to 200  $\mu$ L under gentle N<sub>2</sub> flow (Ditto et al., 2018). Next, 5  $\mu$ L aliquots were analyzed on an SBAQ reverse phase column using water (A) and methanol (B) as mobile phases, running the following solvent gradient: 95% (A) for 2 minutes, then solvents ramped to 10% A and 90% B for 20 minutes, then held at 10% A and 90% B for 5 minutes, and finally returned to initial conditions for the next run (Ditto et al., 2018). The ESI source was operated in positive and negative ionization mode, and the Q-TOF was operated in both MS and MS/MS mode, following previously described methods (Ditto et al., 2018, 2020). All data discussed here report both positive and negative mode peaks; when a compound ionized well in both modes, its abundances in positive and negative mode were averaged, and it was only tabulated once.

Filter extracts were also analyzed via GC-APCI-MS using the GERSTEL TD 3.5+. For GC-APCI-MS analysis, 1  $\mu$ L aliquots were automatically injected by the GERSTEL system into the TD inlet. The inlet was subsequently desorbed at 310°C for 10 minutes, while trapping analytes on the CIS at -100°C, as described above. The APCI and Q-TOF operating conditions were the same as for adsorbent tubes.

Daily system checks using authentic standards were run with filter samples on LC and GC, focusing on a set of functionalized liquid standards with a range of oxygen-, nitrogen-, and sulfur-containing functional groups (discussed above (Ditto et al., 2018, 2020)). These standards were used to determine an average response factor of functionalized analytes, which was in turn used to estimate mass concentration analyzed with the filter samples (Section S4).

In addition, as part of data quality control for both adsorbent tubes and filters, we performed a targeted search through sample data for common biomass burning tracers such as levoglucosan, benzenediols, methoxyphenols, vanillin, vanillic acid, acetovanillone, and dehydroabietic acid, among others. However, the goal of this study was to examine the complex mixture in forest fire smoke and to study molecular-level trends in the evolution of the mixture as a whole. As such, the methods applied here for sample analysis and data analysis were geared towards this purpose, rather than to focus on particular tracer compounds, which were targeted by other instruments in the aircraft payload (e.g. PTR-ToF-MS). While several of these tracers were outside of the carbon number range of interest in this study, we searched for them in the adsorbent tube and filter data to ensure that our methods captured a range of expected biomass burning emissions and transformation products based on past field and laboratory observations (e.g. levoglucosan was observed in the particle-phase across all 5 screens; vanillin and acetovanillone were observed in all 4 screens of gas-phase measurements; vanillic acid was observed prominently in both phases (Schauer et al., 2001; Simoneit et al., 1993)).

### S3. Supporting data analysis methods details

There are two types of analyses discussed in this work: non-targeted (for particle-phase LC-ESI-MS, LC-ESI-MS/MS, and GC-APCI-MS) and targeted (for gas-phase GC-APCI-MS).

The details of both approaches are discussed in previous work but we summarize the important points here (Ditto et al., 2018, 2020; Khare et al., 2019).

*S3.1 Non-targeted analysis:* In brief, for non-targeted analysis, the Q-TOF examined mass spectra across the entire LC elution time for a particular sample. Peak, formula, and structural identifications were extensively quality controlled (including subtraction of any contaminants or artifacts from field blanks, and elimination of low quality peaks and formula/structural identifications (Ditto et al., 2018, 2020)) but were not restricted to target a particular set of compounds. Elemental formula parameters were set to  $C_{3-60}H_{4-122}O_{0-20}N_{0-3}S_{0-1}$ , and no significant change in top-ranked identifications was observed when expanding the nitrogen and sulfur elemental counts. For LC-ESI-MS/MS analysis, mass spectra were imported to SIRIUS with CSI:FingerID, and this software was used to predict structures. We note that in this study, we did not focus on exact molecular configurations but rather the presence or absence of functional groups, similar to past work (Ditto et al., 2020). We also note that organonitrates were tallied according to prior approaches; this functional group was poorly identified by SIRIUS and CSI:FingerID, so characteristic neutral losses were used to identify organonitrates (see reference for further discussion (Ditto et al., 2020)). However, as a result, the co-occurring functional groups on organonitrate compounds (predicted by SIRIUS and CSI:FingerID) were assumed to be invalid. So, organonitrates were included in the functional group tally shown in Figure 1C and Figure S6, but not in any subsequent analyses of functional group co-occurrence. The effect of this exclusion was minor since organonitrates had minimal presence in this relatively fresh forest fire plume (~3% on average; Figure 1C). In addition, nitrogen or sulfur atoms in non-aromatic rings were tallied both as a “nitrogen in ring” or “sulfur in ring” (Figure 1C) and as any other



applicable functional group (e.g. amine, sulfone). Hence, they are reported separately as structural features throughout the manuscript (e.g. Figure 1C, Figure S6-S7A). Importantly, we note that none of the sulfide-containing compounds identified in this work were present as ring-bound sulfur.

S3.2. Targeted analysis: For targeted analysis, we searched for specific large sets of molecular ions across  $C_{10}$ - $C_{25}$  with double bond equivalents (DBE) or corresponding degrees of unsaturation from 0-15 for  $C_xH_y$ ,  $C_xH_yO_1$ ,  $C_xH_yS_1$ , and  $C_xH_yN_1$  compound classes. While some compounds with a greater heteroatom count could be present in the adsorbent tube samples, heteroatom counts were limited to one for each compound class to facilitate the targeted ion search. We focused on this carbon number range to supplement other on-board instrumentation measuring VOCs (i.e. PTR-ToF-MS) and also because the adsorbent tubes' sampling and analytical conditions were optimized for this range of molecular weights.

Peaks for each ion were extracted at 10 ppm mass tolerance and integrated with custom Igor Pro code. Samples were all blank subtracted (using field blanks), and known contaminants and artifacts were removed. Peak areas for  $C_xH_y$  ions were converted to mass using a  $C_xH_y$  response factor for individual carbon numbers and DBEs, determined based on the known distribution of carbon numbers and DBEs in the NIST Gulf of Mexico 2779 Macondo Crude Oil standard with GC and soft ionization (Khare et al., 2019; Worton et al., 2015). To convert  $C_xH_yO_1$  and  $C_xH_yS_1$  peak areas to mass, we applied the average  $C_xH_y$  response factors for aromatic compounds (which had limited fragmentation in the APCI source) based on an intercomparison of mass responses from available oxygen- and sulfur-containing individual authentic standards, evaluations of fragmentation patterns of these functionalized species, and

determination of an analogous carbon number based on the volatility difference introduced by adding an oxygen or sulfur heteroatom to a  $C_xH_y$  hydrocarbon. This resulted in shifting the average response factors up by 1 or 2 carbon numbers when accounting for the presence of oxygen or sulfur heteroatoms, respectively, and accounting for the ratio of  $[M+H]^+$  to  $[M]^+$  ion abundance observed.  $C_xH_yO_1$  and  $C_xH_yS_1$  response factors were based on the  $C_xH_y$  response factor because of limited availability of individual oxygen- or sulfur-containing standards across the entire carbon number and structural range, and because of greater structural ambiguity in these complex functionalized mixtures (due to a range of possible oxygen- and sulfur-containing functional groups and the possibility of double bonds both in the carbon backbone structure and in the functional group itself). We acknowledge that this approach comes with added uncertainty and apply it here to provide useful context for the relative mass of  $C_xH_yO_1$  and  $C_xH_yS_1$  compared to  $C_xH_y$ . However, it is critical to note that the uncertainty in the conversion from peak area to mass does not affect our results that describe trends across screens and the diversity of molecular size and structure observed (e.g. straight/branched vs. aromatic)—these features were all observed in the ion abundance data prior to mass estimation.  $C_xH_yN_1$  was studied here in terms of peak area only.

The vast majority of the compound mass observed via targeted analysis in the  $C_{10}$ - $C_{25}$  range should have existed in the gas-phase. This is based in part on significant undersampling for particles at the adsorbent tube inlet (discussed in the main text). This is also based on partitioning coefficients calculated with estimated aerosol loading (from AMS OA concentration data, Figure 4B) and the approximate saturation mass concentration for this carbon number range (Equation 1, from Donahue et al., 2009) (Donahue et al., 2009, 2011):

$$\xi_i = \frac{1}{1 + \frac{c_i^*}{c_{OA}}} \quad [1]$$

In Equation 1,  $\xi_i$  is a partitioning coefficient of compound  $i$ ,  $C_i^*$  is the effective saturation concentration of compound  $i$ , and  $C_{OA}$  is the mass concentration of the existing organic particle phase. As shown in Table S2, compounds below  $\sim C_{22}-C_{23}$  should have existed mostly in the gas-phase, though compounds  $\sim C_{20}$  and up would have readily partitioned from and equilibrated with the particle-phase with small changes in OA concentration. The range of compounds observed was therefore likely to evaporate from the particle-phase with plume dilution, discussed in the main text in Section 3.3 and Figure 4B.

#### S4. Representativeness of mass analyzed via filter and adsorbent tube samples

The analysis of particle-phase samples discussed here used methods geared towards functionalized OA, i.e. OA with one or more oxygen-, nitrogen-, and/or sulfur-containing functional group or structural feature. Samples were extracted in methanol due to its effectiveness at extracting polar analytes from similar filter media in past studies (Ditto et al., 2018; Ng et al., 2008; Riva et al., 2016a, 2016b; Surratt et al., 2008), and samples were analyzed using electrospray ionization (ESI), which is sensitive towards compounds with oxygen-, nitrogen-, and/or sulfur-containing functional groups that readily interact with protons and other ions in the LC system to form charged adducts. For particle-phase samples analyzed with LC-ESI-MS, CH and CHS compound classes were not measured, as they ionized poorly in the ESI source (Ditto et al., 2018, 2019). For these same particle-phase samples analyzed via GC-APCI-MS, CH and CHS were measured (due to improved ionization via APCI), but the contribution of CH was likely underestimated due to fragmentation of alkanes in the ionization source (discussed in Figure S5 and explicitly calibrated for in the targeted adsorbent tube analysis

focused on gas-phase compounds (Khare et al., 2019)) and due to possible solubility limitations in the methanol used as extraction solvent.

Though not designed to be an exact intercomparison for mass closure, we evaluated the total mass analyzed from the filters and adsorbent tubes discussed in this study. The sample preparation and analysis methods for filters were tailored for the analysis of functionalized OA; an estimate of functionalized compound mass loading from non-targeted LC-ESI-MS and GC-APCI-MS analysis of filter samples with average ESI and APCI response factors suggested that these functionalized components represented an average of 4-7  $\mu\text{g}/\text{m}^3$  across screens, which extended up to 10-19  $\mu\text{g}/\text{m}^3$  when accounting for the large standard deviation in these average response factors and computing mass with maximum rather than average response factors (Ditto et al., 2018). For comparison, AMS OA mass concentrations across these same filter sampling times ranged from 22-36  $\mu\text{g}/\text{m}^3$ . However, there is evidence in this and in past studies for an important contribution from non-functionalized biomass burning OA which would not be measured by the filter sampling methods discussed here, and thus reducing the fraction of comparable OA mass from AMS measurements (Corrigan et al., 2013; Zhou et al., 2017).

In LC-ESI-MS, we have observed response factors for individual standards to vary across complex mixtures with evident but uncertain relationships to compound classes and functional groups, resulting in sensitivity differences between compounds in the ESI source. In this and in past work, we compared compounds across these diverse multi-functional mixtures by both occurrence and abundance. For the latter, it was necessary to assume an equal ionization efficiency across all compounds (and thus an identical average response factor) because of the challenges associated with assigning compound-specific ionization efficiencies to hundreds of multifunctional compounds in a complex mixture without sufficient reference standards (Ditto et

al., 2020). Thus, for comparison, we showed results tabulated both by occurrence and by abundance where applicable.

For comparison, adsorbent tube samples contained 11-29  $\mu\text{g}/\text{m}^3$  of gas-phase  $\text{C}_x\text{H}_y$ ,  $\text{C}_x\text{H}_y\text{O}_1$ , and  $\text{C}_x\text{H}_y\text{S}_1$  compounds ( $\text{C}_{10}\text{-C}_{25}$ ), from targeted search results.

#### S5. Differences in LC and GC results for particle-phase data

We observed compounds with notably different oxygen, nitrogen, and sulfur content via LC-ESI and GC-APCI techniques for particle-phase filter samples due to differences in chromatographic and ionization approaches. LC is better suited for larger, more polar compounds that are less volatile and contain more functional groups. In contrast, GC-amenable compounds tend to be less polar and more thermally stable, with fewer functional groups. ESI is very sensitive towards functionalized species (e.g. that can be readily protonated or deprotonated), while APCI can more effectively ionize less polar analytes (Pudenzi and Eberlin, 2016). For example, particle-phase compounds from filter samples observed via non-targeted LC-ESI analysis contained an overall average of 4.7 oxygen atoms, with  $\overline{O/C}=0.4$ . Nitrogen-containing compounds had an  $\overline{O/N}=2.5$ , and sulfur-containing compounds had an  $\overline{O/S}=5.0$ . In contrast, compounds from these same filter samples observed via non-targeted GC-APCI analysis contained an overall average of 2.1 oxygen atoms, with  $\overline{O/C}=0.2$ . Nitrogen-containing compounds had an  $\overline{O/N}=1.8$ , and sulfur-containing compounds had an  $\overline{O/S}=3.3$ . An estimate of carbon oxidation state for CH and CHO compounds yielded  $\overline{OSc} = -0.5$  for LC-ESI filter samples and a less oxidized  $\overline{OSc} = -1.3$  for GC-APCI filter samples (Kroll et al., 2011).

An analysis of filter extracts with non-targeted GC-APCI-MS (Figure S5) showed greater contributions of carbon-, hydrogen-, and oxygen-containing (CHO) and carbon- and hydrogen-

298 containing (CH) compound classes than non-targeted LC-ESI-MS because these compound  
299 classes are GC amenable, while LC-ESI-MS highlighted contributions from more functionalized  
300 species. As the complex mixture of compounds in the forest fire plume aged, it became  
301 increasingly functionalized and thus less GC amenable. Using exclusively GC techniques to  
302 study the evolution of smoke plumes may therefore miss more functionalized, non-GC amenable  
303 compounds. Here, we focused on LC-ESI-MS data for the particle-phase to study these  
304 functionalized species. While LC-ESI-MS does not ionize CH and CHS compound classes  
305 effectively, we also did not observe much contribution from particle-phase CHS compounds in  
306 the non-targeted GC-APCI-MS data for these filter samples (Figure S5), and non-functionalized  
307 hydrocarbons in the particle-phase (i.e. CH compounds) were not the focus of this study. As  
308 discussed above, the lack of CH or CHS observed in the particle-phase data even with GC-APCI-  
309 MS techniques was potentially driven by the choice of methanol for filter solvent extraction.

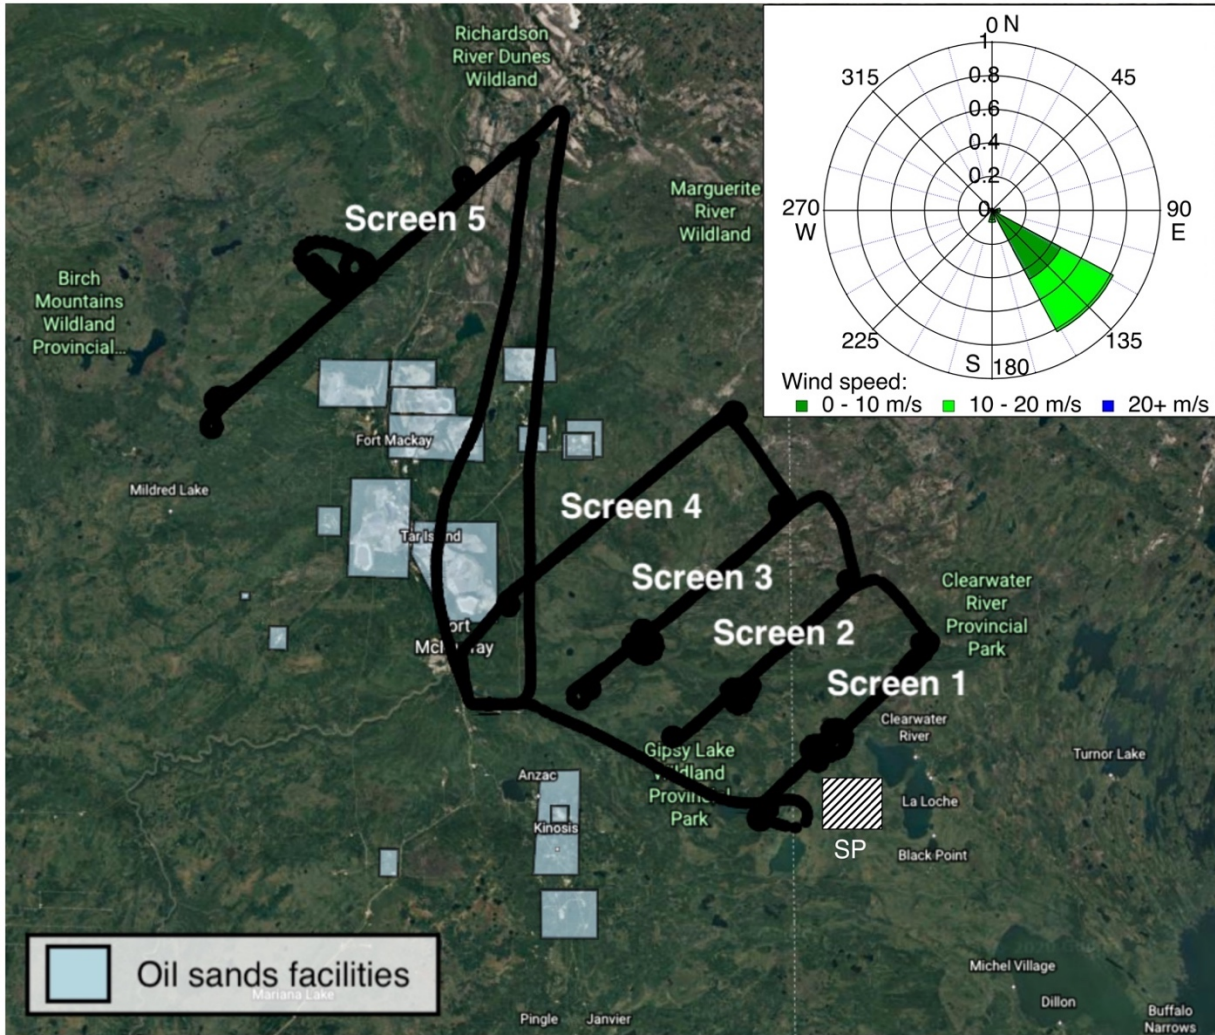

**Figure S1.** The flight path tracking the forest fire plume on June 25, 2018. Shaded blue regions represent local oil sands processing facilities. Cross hatching represents approximate location of the fire source, located ~10 km from screen 1 (SP is the south plume, whose source was identified via satellite imagery; the north plume source was not identified via satellite imagery, so it is not explicitly shown here). Screens 1 and 2 were ~26 km apart, screens 2 and 3 were ~24 km apart, screens 3 and 4 were ~29 km apart, and screens 4 and 5 were ~83 km apart. Prevailing winds were from the southeast during the sampling period as shown by the wind rose in the upper right. Map used to plot flight tracks: © Google Earth: Google, Maxar Technologies.

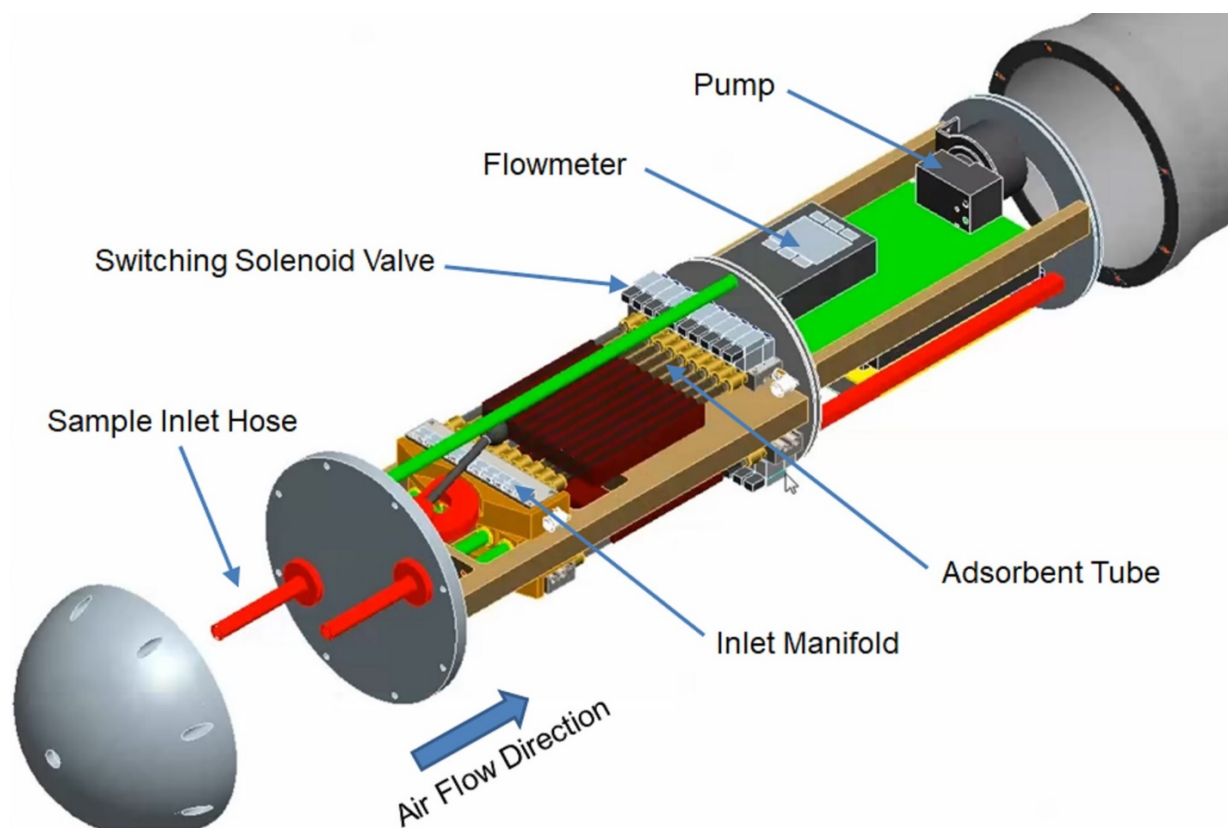

**Figure S2.** Drawing depicting the key components of the wing pod sampler. Teflon tubing (7" long, 1/8" diameter) was connected to the sample inlet hose and to the inlet manifold. A temperature and pressure sensor was attached to the inlet manifold to monitor the properties of sampled air. Adsorbent tubes for the entire flight were loaded into the sampler, and each tube was connected to the manifold. A solenoid valve was positioned downstream of each adsorbent tube to remotely switch air flow between samples. A flow meter and pump were installed further downstream to control air flow.



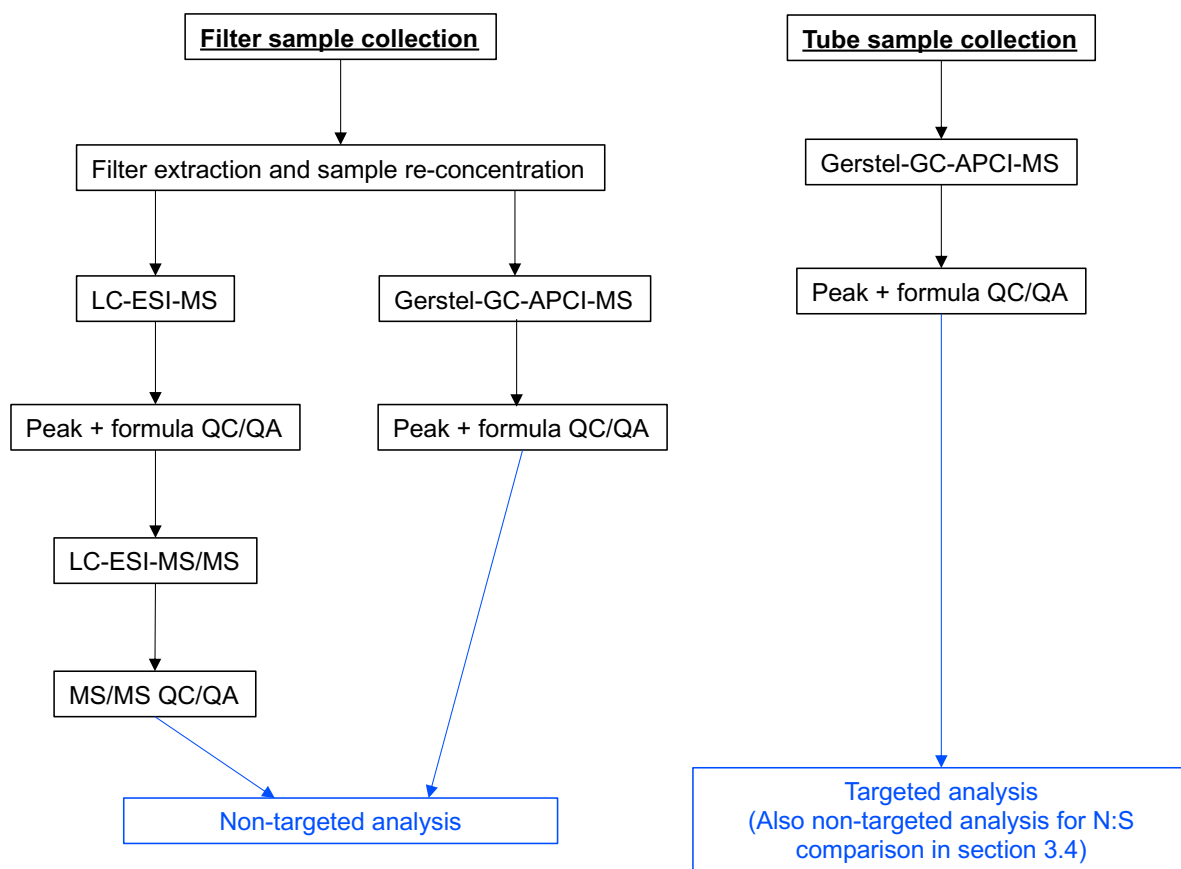

326 **Figure S3.** Summary of adsorbent tube and filter sample collection methods and data analysis.

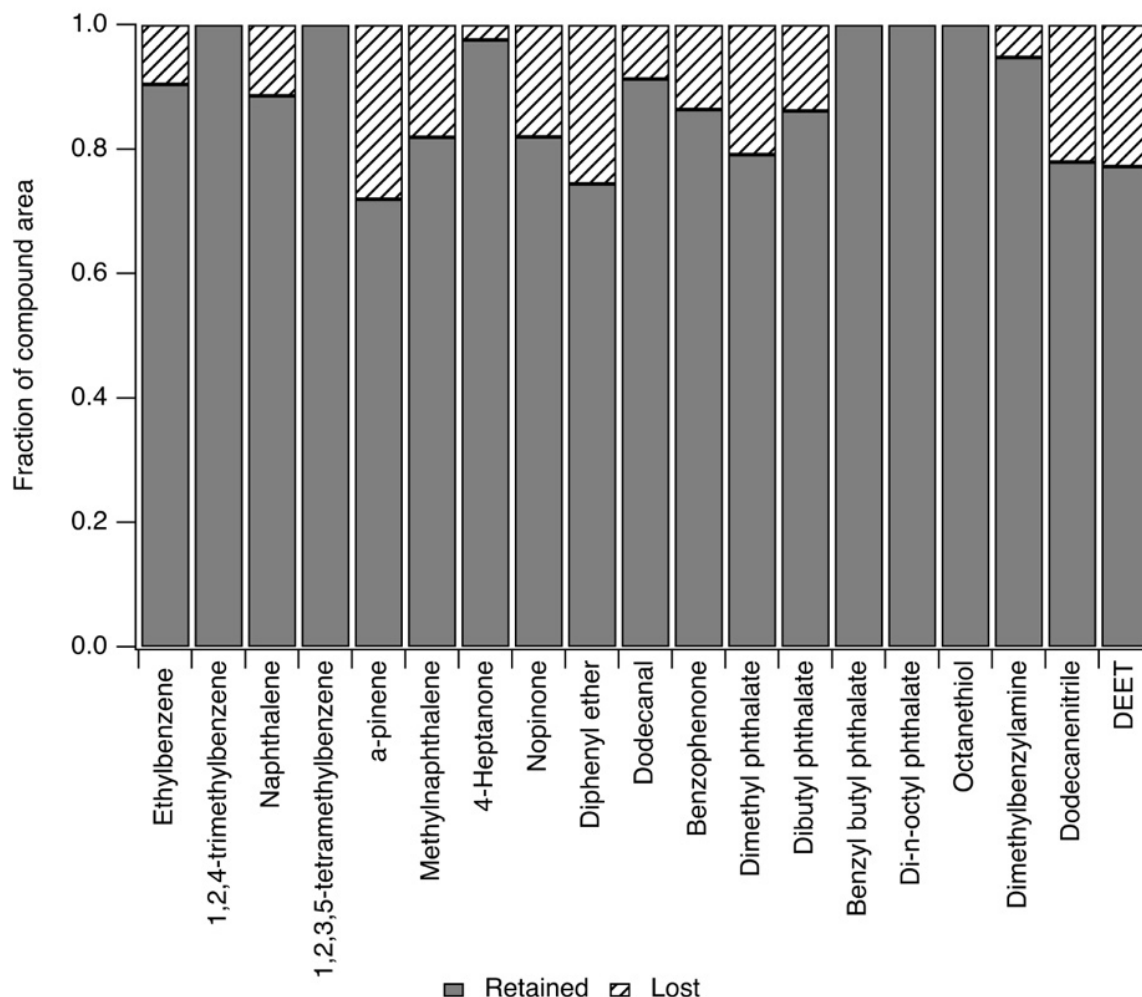

**Figure S4.** Evaluation of losses associated with adsorbent tube dry purge prior to tube desorption and analysis. Peak areas from experiments using standards with and without a dry purge were compared (y-axis). The dry purge conditions used here were similar to those used in past studies with similar instrumentation, and have been shown to be effective both at removing accumulated water while ensuring high percent recovery of analytes (Ochiai et al., 2014). While some loss of volatile analytes is expected (Ochiai et al., 2014), most analytes across a range of functional groups were retained reasonably well (~86% retained, on average).

(A) Compound class, by abundance

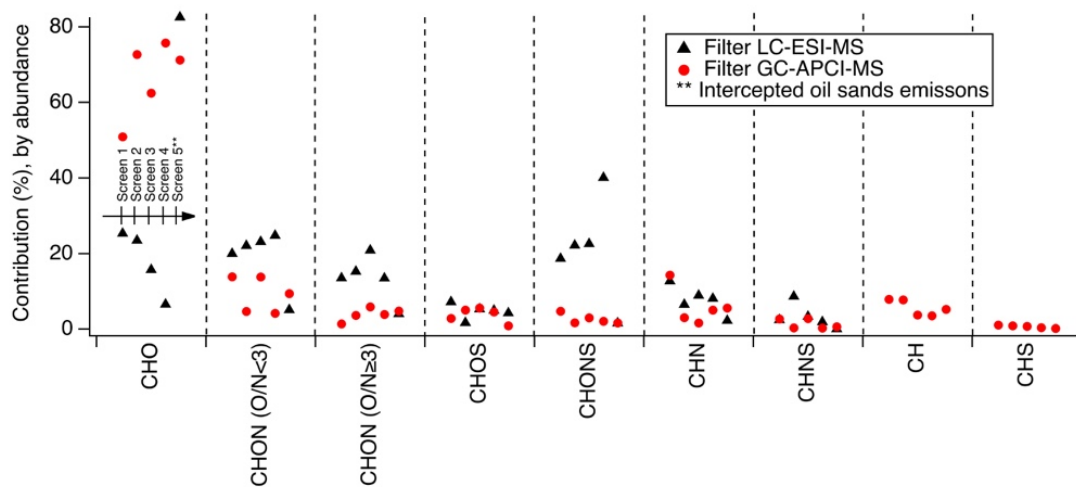

(B) Compound class, by occurrence

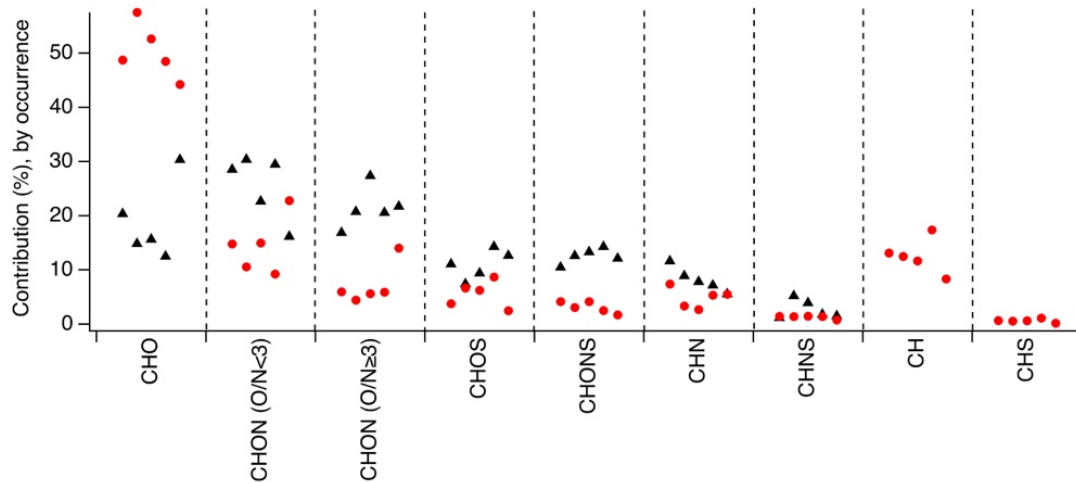

(C) LC-ESI compound class abundance

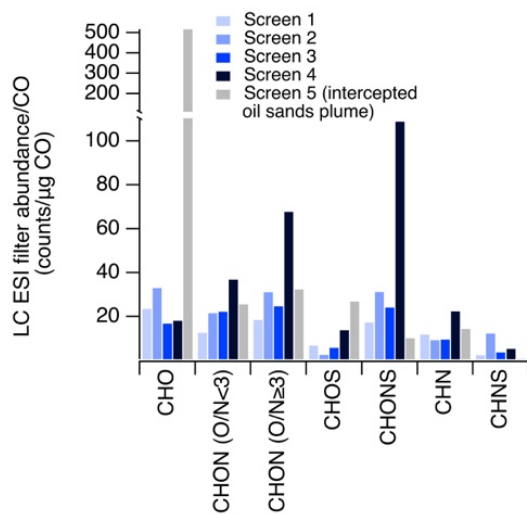

(D) GC-APCI compound class abundance

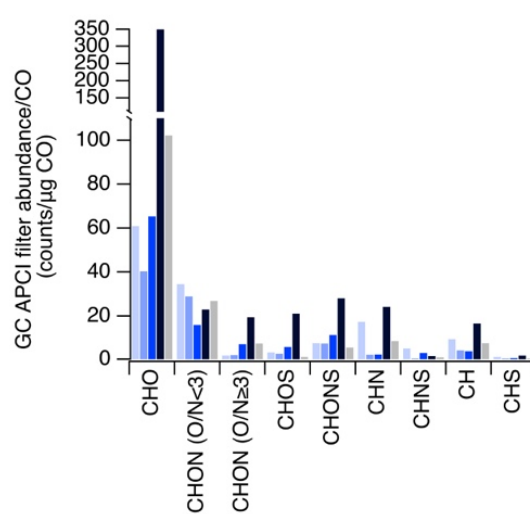

**Figure S5.** (A) Compound class distribution for particle-phase non-targeted LC-ESI-MS and GC-APCI-MS analyses, weighted by ion abundance. Percent contribution on the y-axis refers to each compound class' contribution to all observed compound ion abundance in LC or GC analysis. (B) For comparison, compound class distribution for particle-phase non-targeted LC-ESI-MS and GC-APCI-MS analyses, shown by occurrence (i.e. the number of compounds in each category). (C) Compound class distribution from particle-phase LC-ESI-MS analysis, and (D) compound class distribution from particle-phase GC-APCI-MS analysis, both shown as raw ion abundance normalized by the average carbon monoxide mass corresponding to the filter sampling period. In all panels, CH and CHS compounds are excluded from LC-ESI-MS analysis due to poor ESI ionization efficiency (Section S5). CH in GC-APCI-MS analysis may be underestimated due to known fragmentation of alkanes in the APCI source. This fragmentation is accounted for in the mass calibrated, targeted analysis of adsorbent tube compounds. These data are shown to support Figure 1A-B. GC-APCI-MS data from filter extracts are shown here for comparison with LC-ESI-MS data, but are not used in subsequent analyses. Differences between GC and LC results are due to differences in ionization techniques used in both methods (see Section S5) as well as changes in mixture composition that shift its GC- and LC-amenability.

(A) Functional group distribution, by ion abundance normalized by carbon monoxide mass

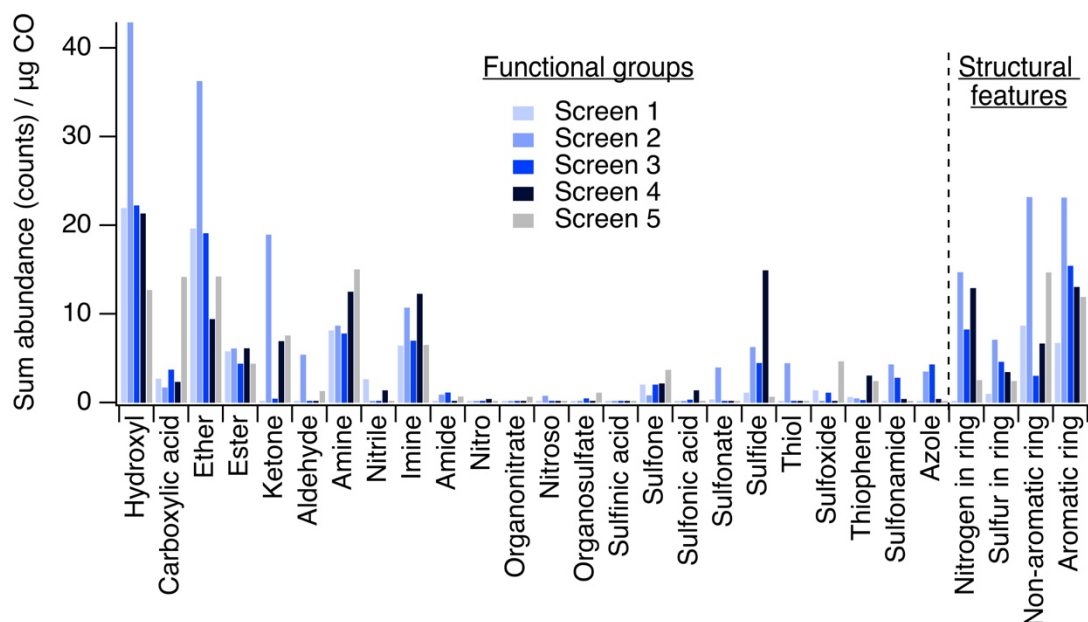

(B) Functional group distribution, by occurrence

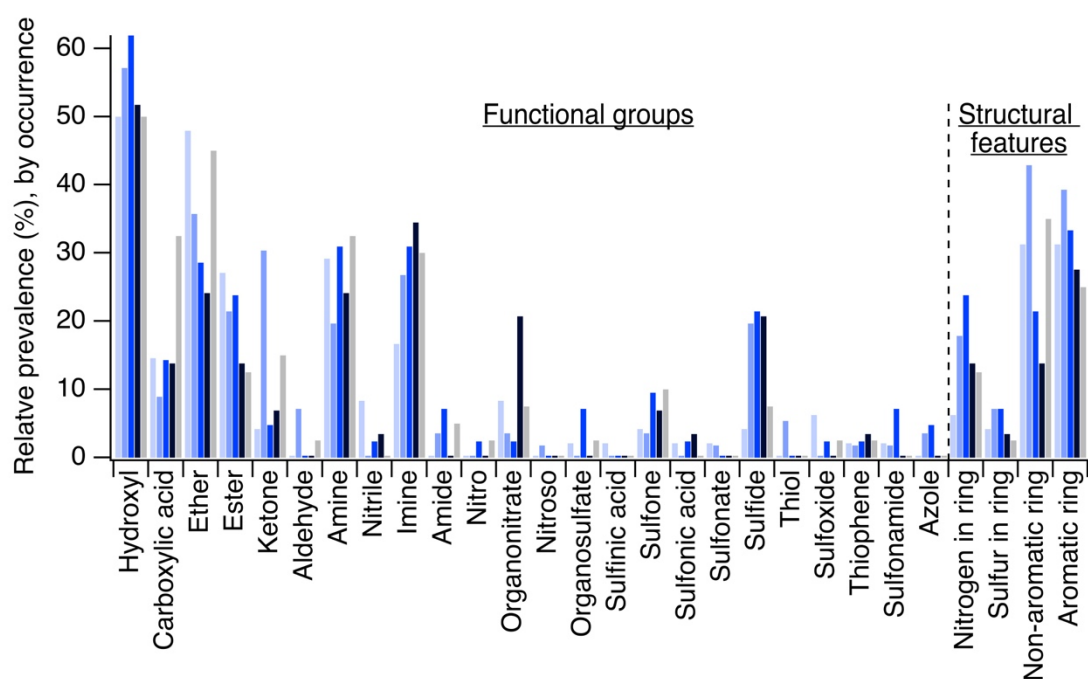

**Figure S6.** Functional group distribution of particle-phase functionalized OA from LC-ESI-MS/MS analysis represented (A) by raw abundance (normalized by carbon monoxide mass from corresponding sampling time) and (B) by occurrence (i.e. not weighted by abundance, not normalized by carbon monoxide mass). These data are shown to support Figure 1C.

(A) CHONS functional groups, by screen

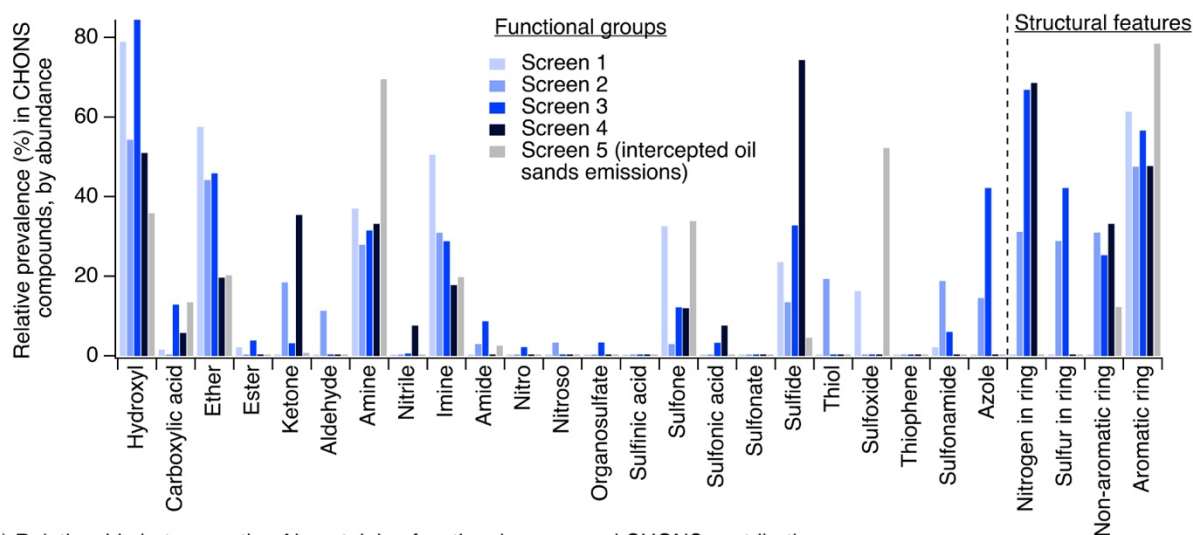

(B) Relationship between other N-containing functional groups and CHONS contribution

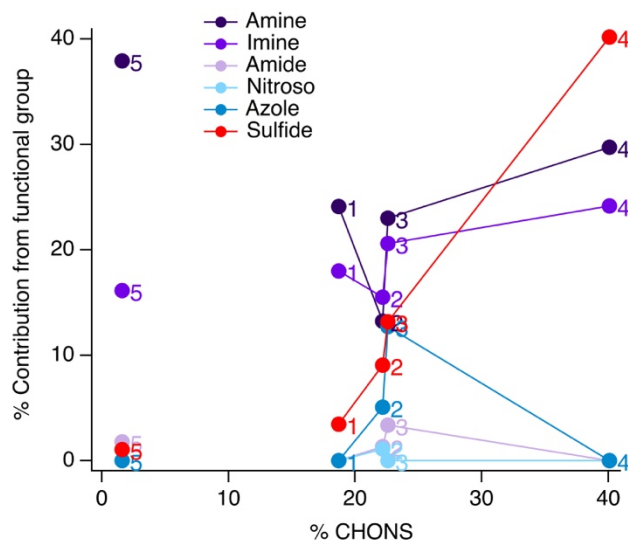

**Figure S7.** (A) Functional groups that contributed to CHONS compounds, weighted by abundance and shown by screen (shown to support Figure 2A-B). (B) Relationship between the contribution of amines, imines, amides, nitrosos, azoles, and sulfides to all functionalized OA and the contribution of the CHONS compound class prevalence. Numbers beside each marker represent screen number. None of these nitrogen-containing functional groups trended with the contribution of CHONS compounds, in contrast to the clear relationship between cyclic nitrogen and CHONS (Figure 3C).

(A) CHONS volatility distribution, by screen, by abundance

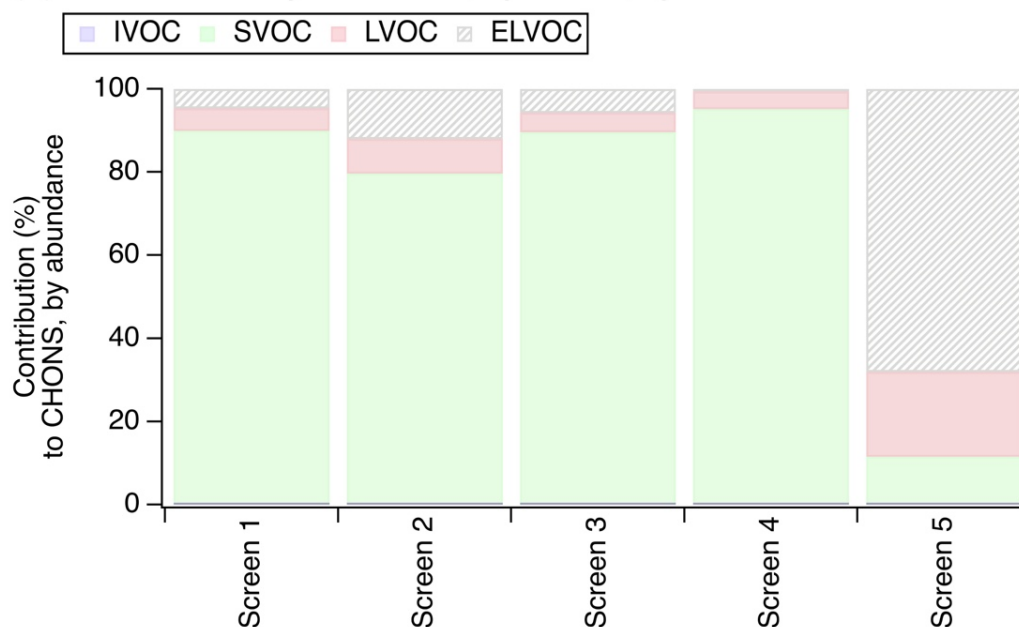

(B) CHONS volatility distribution, by screen, by occurrence

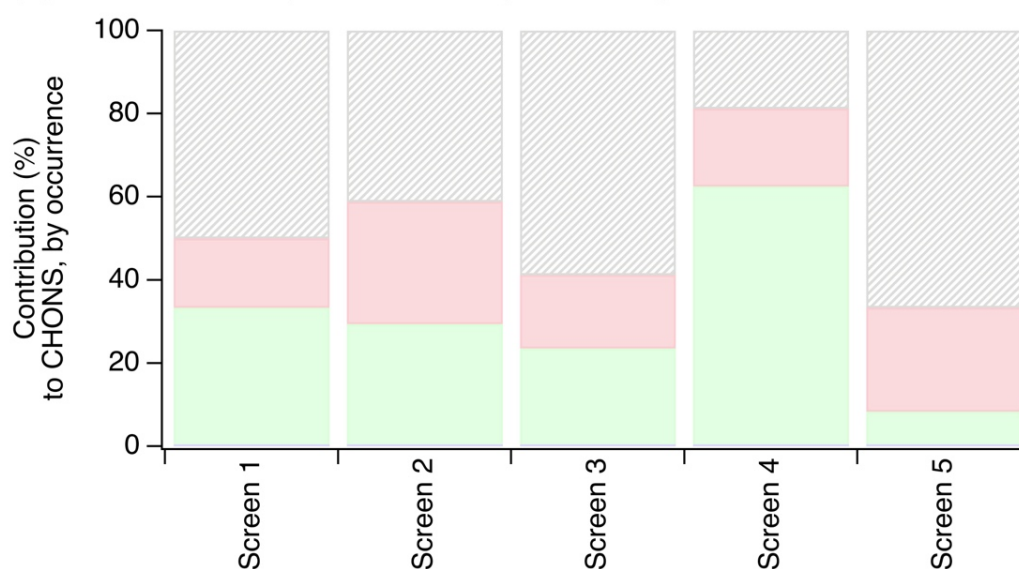

**Figure S8.** Volatility distribution of CHONS compounds, (A) shown by screen, weighted by abundance (to support Figure 2C), and (B) shown by occurrence (for comparison). Volatility was estimated using the parameterization in Li et al. (Li et al., 2016) and grouped into volatility bins following Li et al. and Donahue et al. (i.e. IVOC:  $300 < C_0 < 3 \times 10^6 \mu\text{g}/\text{m}^3$ , SVOC:  $0.3 < C_0 < 300 \mu\text{g}/\text{m}^3$ , LVOC:  $3 \times 10^{-4} < C_0 < 0.3 \mu\text{g}/\text{m}^3$ , ELVOC:  $C_0 < 10^{-4}$  (Donahue et al., 2011; Li et al., 2016)).

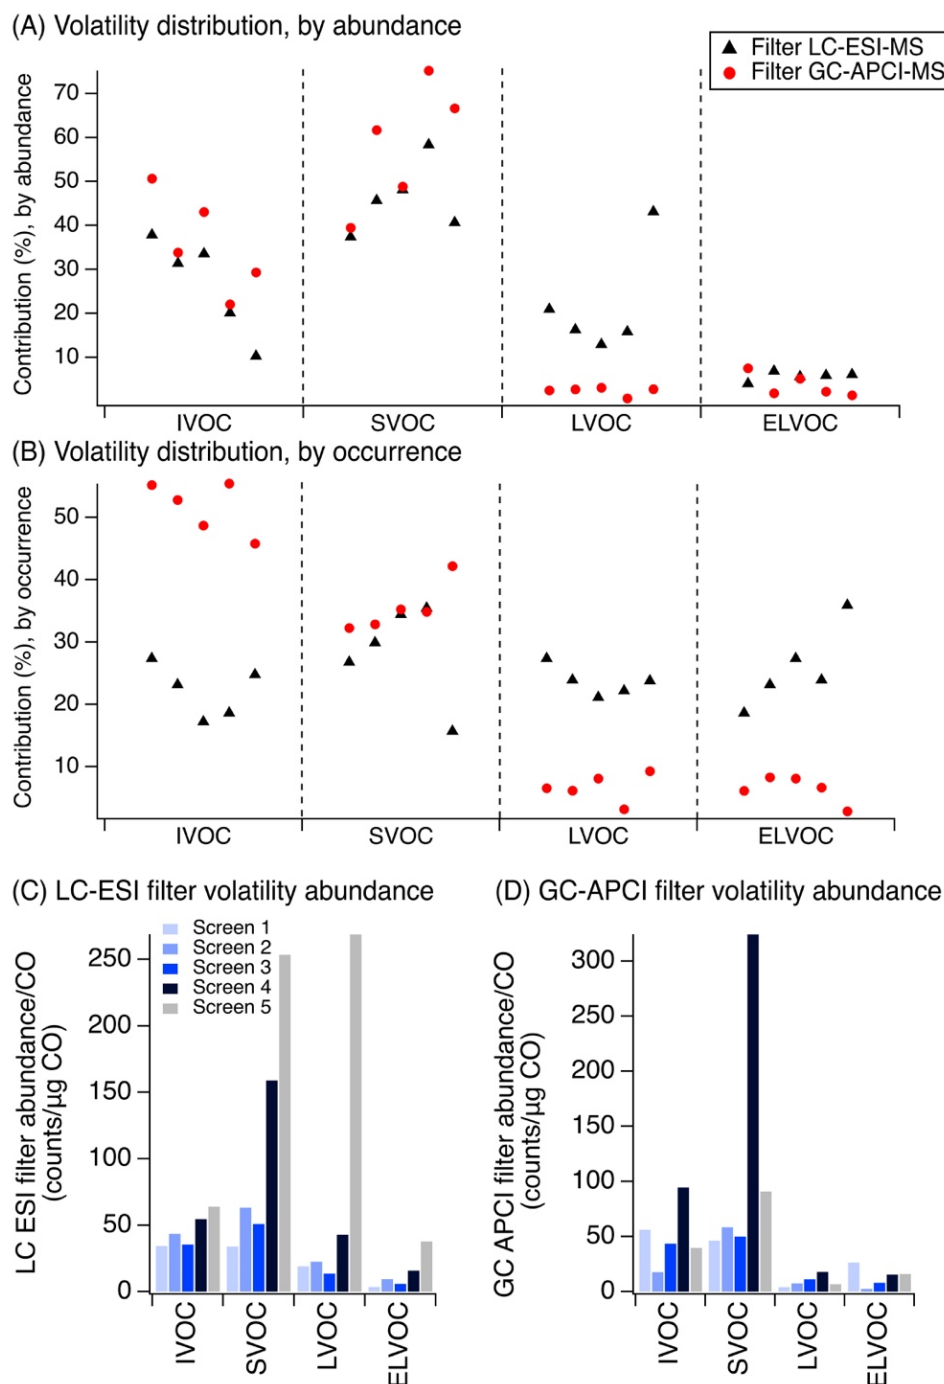

**Figure S9.** Volatility distribution of particle-phase compounds from non-targeted analysis, (A) weighted by abundance, (B) by occurrence (for comparison), (C) for particle-phase LC-ESI-MS samples, shown as raw abundance normalized by carbon monoxide mass, and (D) for particle-phase GC-APCI-MS samples, shown as raw abundance normalized by carbon monoxide mass. For (A-D), volatility was estimated using the parameterization in Li et al and grouped into volatility bins following Li et al. and Donahue et al. (i.e. IVOC:  $300 < C_0 < 3 \times 10^6 \mu\text{g}/\text{m}^3$ , SVOC:  $0.3 < C_0 < 300 \mu\text{g}/\text{m}^3$ , LVOC:  $3 \times 10^{-4} < C_0 < 0.3 \mu\text{g}/\text{m}^3$ , ELVOC:  $C_0 < 10^{-4}$  (Donahue et al., 2011; Li et al., 2016)).



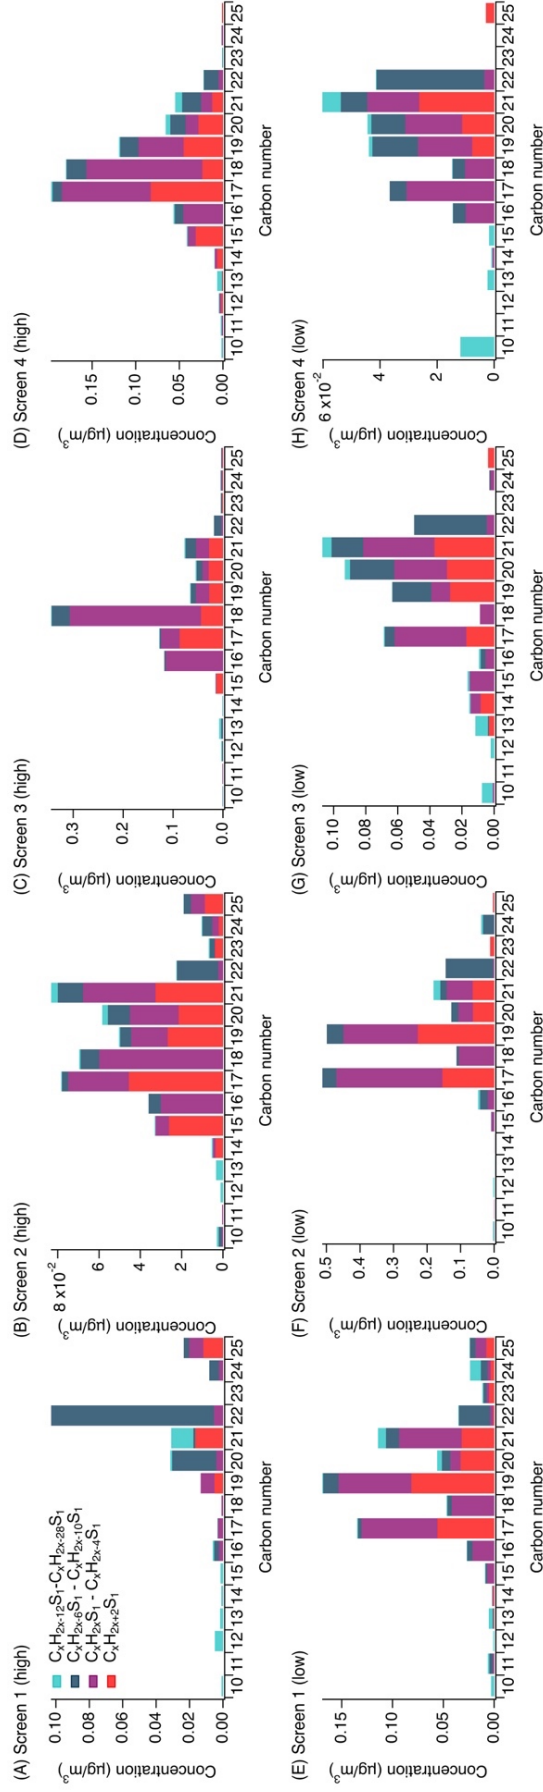

**Figure S10.** Distribution of carbon backbone structures for  $C_xH_yS_1$  compounds collected on adsorbent tubes across screens 1-4, from targeted GC-APCI-MS analysis. Here,  $C_xH_{2x+2}S_1$  represents saturated sulfur-containing compounds,  $C_xH_{2x}S_1$ - $C_xH_{2x-4}S_1$  represents sulfur-containing compounds with the equivalent of 1-3 double bonds and/or rings,  $C_xH_{2x-6}S_1$ - $C_xH_{2x-10}S_1$  represents sulfur-containing compounds with the equivalent of 4-6 double bonds and/or rings (e.g. single-ring aromatics), and  $C_xH_{2x-12}S_1$ - $C_xH_{2x-28}S_1$  represents sulfur-containing compounds with the equivalent of 7-15 double bonds and/or rings (e.g. PAHs).  $C_xH_yS_1$  volatilities were estimated using the parameterization in Li et al. (Li et al., 2016)—while there was no parameterization for compounds containing only carbon, hydrogen, and sulfur, the parameterizations for carbon and hydrogen containing compounds (“CH”, for  $C_xH_y$  compounds) and carbon, hydrogen, oxygen, and sulfur-containing compounds (“CHOS” for  $C_xH_yO_zS_n$  compounds) were used. In the case of the CHOS parameterization, 0 oxygens were included. This parameterization yielded semivolatile sulfur-containing compounds (saturation mass concentrations  $0.3 < C_0 < 300 \mu\text{g}/\text{m}^3$  (Donahue et al., 2011; Li et al., 2016)) between  $C_{16}$ - $C_{23}$  (treating  $C_xH_yS_1$  as CHOS) and  $C_{19}$ - $C_{24}$  (treating  $C_xH_yS_1$  as CH). As shown here, most observed  $C_xH_yS_1$  compounds fell within this carbon number range. Screen 1 (low altitude) and screens 2, 3, and 4 (high altitude) showed the highest acetonitrile concentration, suggesting that the corresponding adsorbent tube samples were collected from the most concentrated portions of the plume (when comparing each low/high altitude pair at each screen).

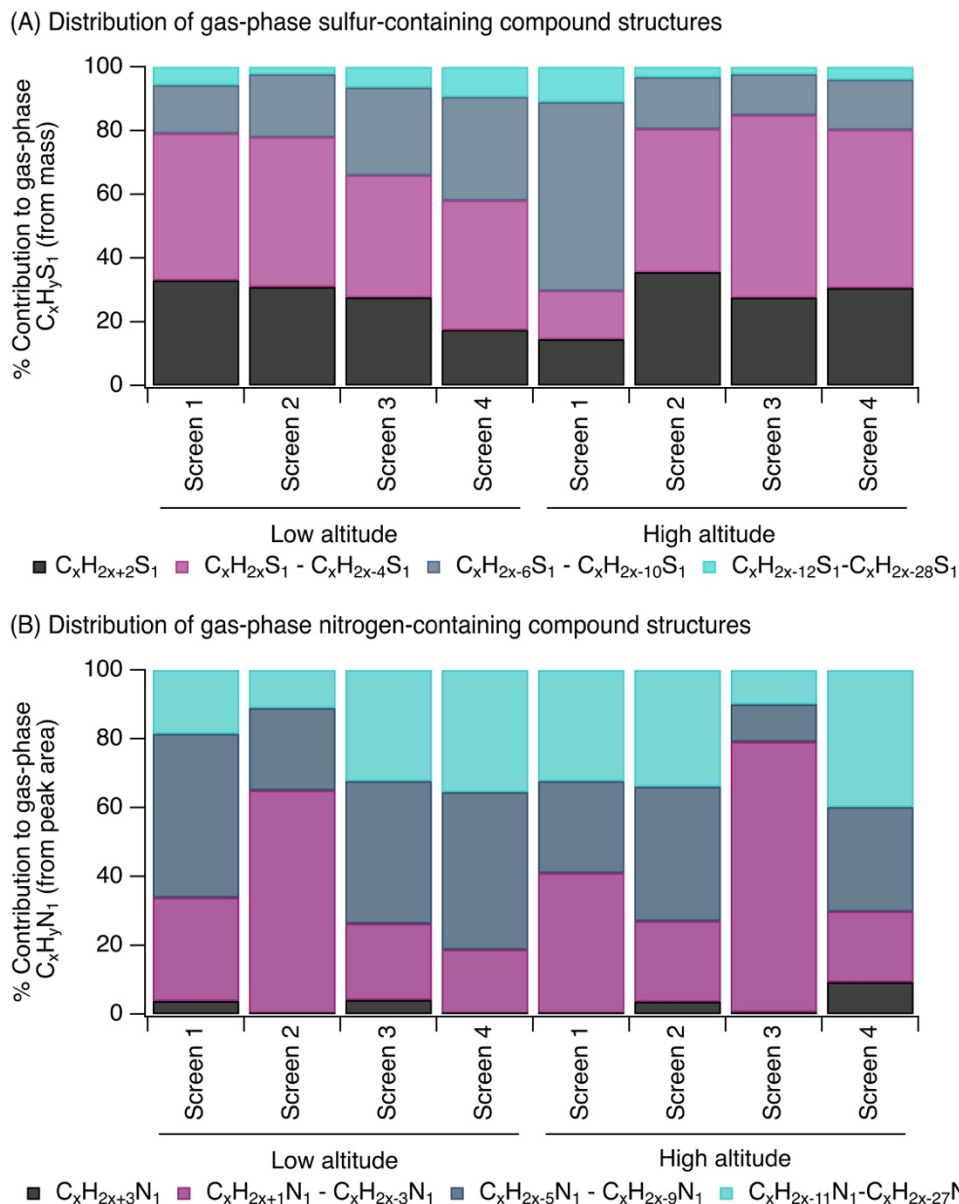

**Figure S11.** (A) Distribution of multiple bonds or ring structures for gas-phase  $C_xH_yS_1$  compounds from targeted GC-APCI-MS analysis, where sulfur-containing compound peak areas were converted to mass as discussed in Section S3. (B) Distribution of multiple bonds or ring structures for gas-phase  $C_xH_yN_1$  compounds from targeted GC-APCI-MS analysis. The nitrogen distribution was based on peak area. This contained a range of nitriles, pyrroles, pyridines, and other structures similar to past work (Akagi et al., 2011; Andreae, 2019; Gilman et al., 2015; Hatch et al., 2015; Koss et al., 2018). For (A-B), sulfur and nitrogen can form single or multiple bonds, so the presence of multiple bonds or rings may be in the carbon backbone structure or on the sulfur/nitrogen heteroatom. Here, black bars represent saturated compounds, pink bars represent those with the equivalent of 1-3 double bonds and/or rings, dark teal bars represent those with the equivalent of 4-6 double bonds and/or rings (includes single ring aromatics), and light teal bars represent those with the equivalent of 7-15 double bonds and/or rings (includes PAHs).

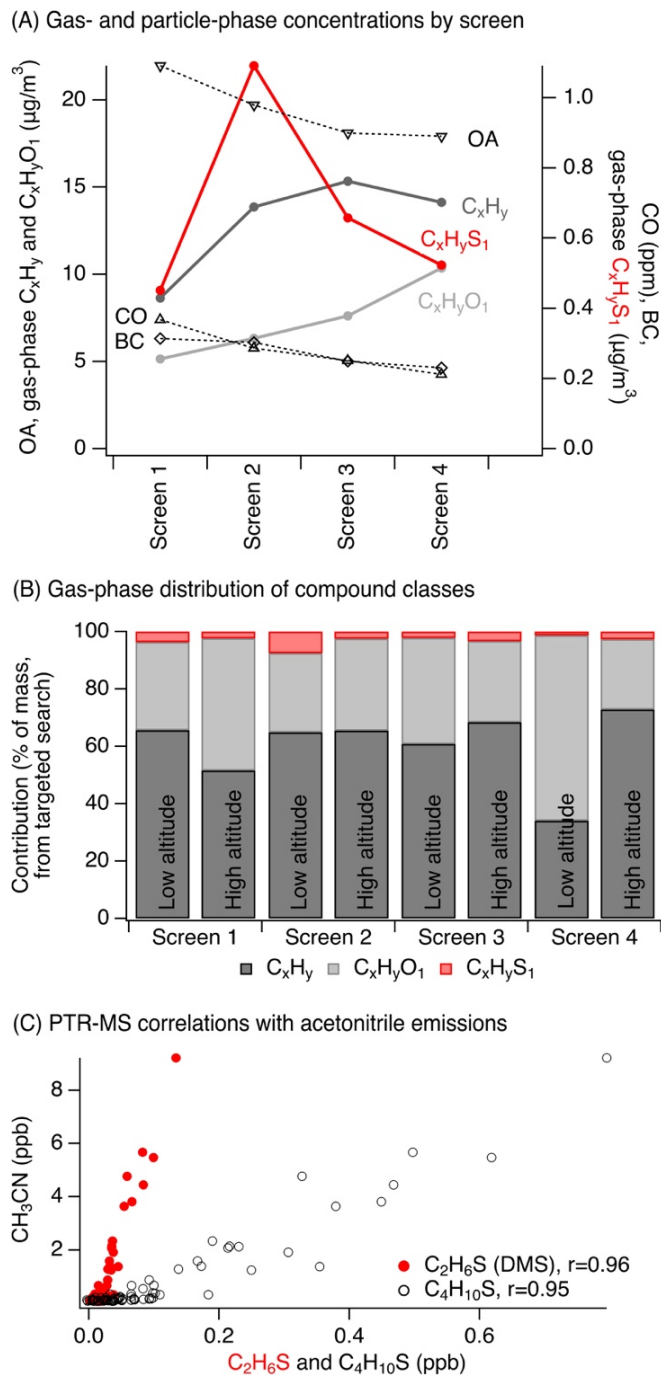

**Figure S12.** (A) Concentration of gas-phase  $C_xH_y$ ,  $C_xH_yO_1$ , and  $C_xH_yS_1$  compounds, BC, OA from AMS, and CO as tracers of plume dilution (shown to support Figure 4B). (B) Relative contribution of  $C_xH_y$ ,  $C_xH_yO_1$ , and  $C_xH_yS_1$  compounds from the targeted search in the gas-phase ( $C_{10}$ - $C_{25}$ ) from GC-APCI-MS analysis.  $C_xH_y$ ,  $C_xH_yO_1$ , and  $C_xH_yS_1$  contributions were converted to mass concentrations prior to analysis.  $C_xH_yN_1$  was not included here because  $C_xH_yN_1$  was examined in terms of peak area only. (C) Correlation between concentration of  $C_2H_6S$  (dimethylsulfide (DMS) and isomers) and  $C_4H_{10}S$  (diethylsulfide and isomers) versus acetonitrile from aircraft PTR-ToF-MS data.

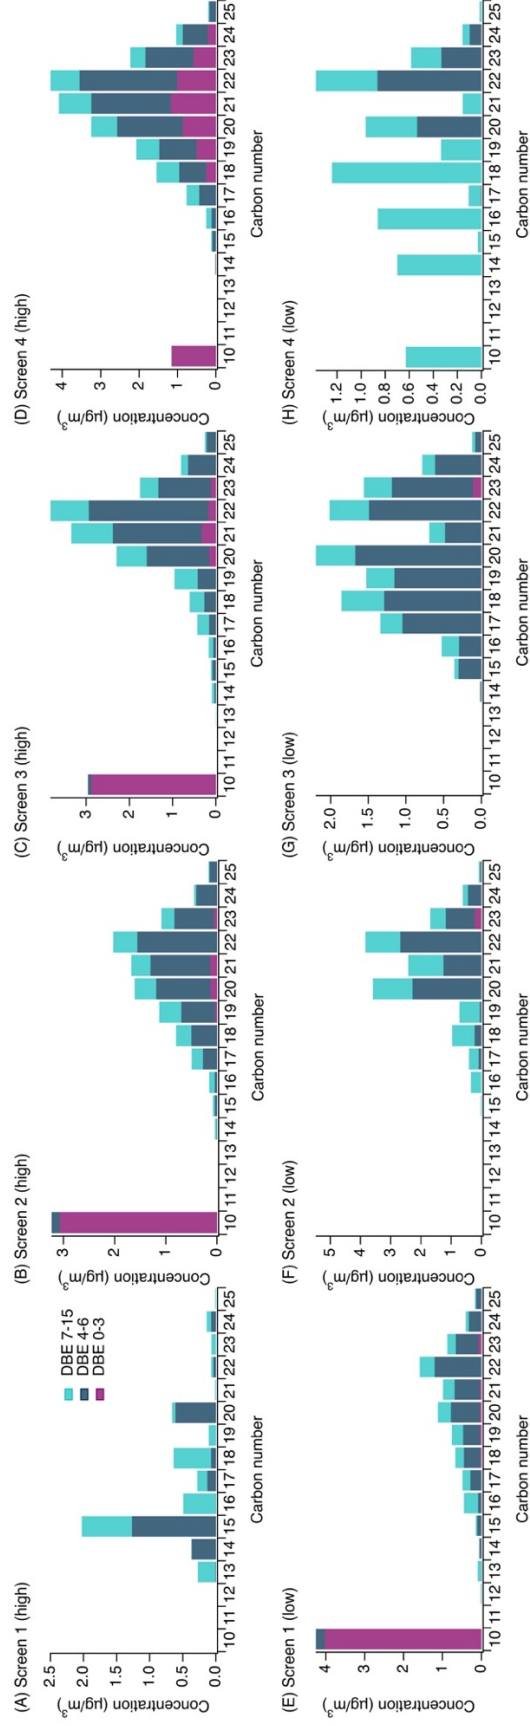

**Figure S13.** Distribution of carbon backbone structures for gas-phase  $C_xH_y$  hydrocarbons collected on adsorbent tubes across screens 1-4 (from targeted GC-APCI-MS analysis). DBE 0-3 represents alkanes, alkenes, and cyclic alkanes. DBE 4-6 represents single ring aromatics. DBE 7-15 represents polycyclic aromatics hydrocarbons (PAHs). The observed  $C_{10}$  compounds classified as DBE 0-3 (pink) were dominated by monoterpenes. Screen 1 (low altitude) and screens 2, 3, and 4 (high altitude) showed the highest acetonitrile concentration, suggesting that the corresponding adsorbent tube samples were collected from the most concentrated portions of the plume.

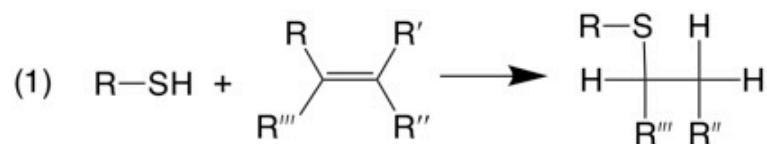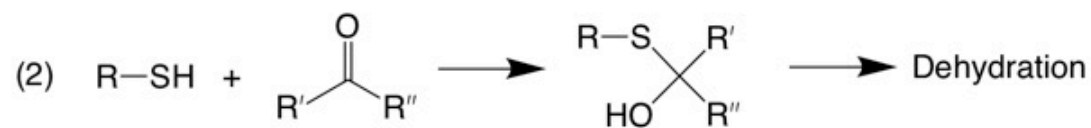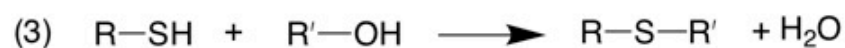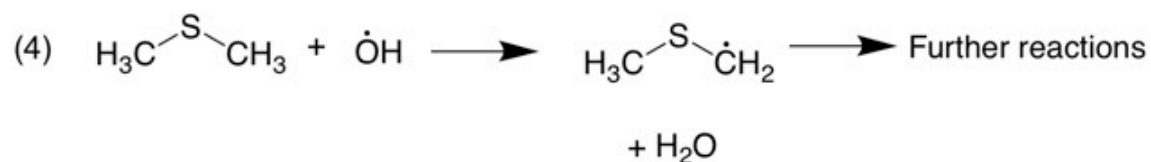

417 **Figure S14.** Possible reaction pathways from the literature, including (1) a thiol-ene reaction  
 418 (Lowe, 2010), (2) reaction with a carbonyl (Jencks and Lienhard, 1966), (3) reaction with an  
 419 alcohol (Mashkina, 1991), and (4) hydrogen abstraction from dimethyl sulfide (Barnes et al.,  
 420 2006).

**Table S1.** Summary table of average flow rates and sampling times.

| <b>Adsorbent tubes</b>  |                          |                     |                      |
|-------------------------|--------------------------|---------------------|----------------------|
| Sample                  | Average flow rate (sccm) | Sampling time (min) | Average altitude (m) |
| Screen 1, low altitude  | 288                      | 52.3                | 655                  |
| Screen 2, low altitude  | 276                      | 6.60                | 641                  |
| Screen 3, low altitude  | 285                      | 9.15                | 809                  |
| Screen 4, low altitude  | 291                      | 4.10                | 727                  |
| Screen 1, high altitude | 278                      | 4.70                | 915                  |
| Screen 2, high altitude | 280                      | 44.0                | 1172                 |
| Screen 3, high altitude | 282                      | 47.0                | 962                  |
| Screen 4, high altitude | 296                      | 30.1                | 1645                 |
| <b>Filters</b>          |                          |                     |                      |
| Sample                  | Average flow rate (slpm) | Sampling time (min) | Average altitude (m) |
| Screen 1                | 47                       | 52.4                | 1115                 |
| Screen 2                | 46                       | 44.0                | 1287                 |
| Screen 3                | 46                       | 47.0                | 1268                 |
| Screen 4                | 47                       | 29.1                | 932                  |
| Screen 5                | 44                       | 101.0               | 1608                 |

**Table S2.** Fraction of hydrocarbons from adsorbent tubes in the gas- vs. particle-phase, based on AMS OA concentration (18-22  $\mu\text{g}/\text{m}^3$ , averaged across low and high altitude adsorbent tube sampling times) and the effective saturation concentration of the hydrocarbons in the range (Donahue et al., 2009, 2011).

| $C^*$<br>( $\mu\text{g}/\text{m}^3$ ) | $\text{Log}_{10}(C^*)$<br>( $\mu\text{g}/\text{m}^3$ ) | Number of<br>carbon<br>atoms | Fraction in the<br>gas-phase | Fraction in<br>particle-phase |
|---------------------------------------|--------------------------------------------------------|------------------------------|------------------------------|-------------------------------|
| 1000000                               | 6.00                                                   | 12.4                         | 1.00                         | 0.00                          |
| 100000                                | 5.00                                                   | 14.5                         | 1.00                         | 0.00                          |
| 10000                                 | 4.00                                                   | 16.6                         | 1.00                         | 0.00                          |
| 1000                                  | 3.00                                                   | 18.7                         | 0.98                         | 0.02                          |
| 100                                   | 2.00                                                   | 20.8                         | 0.84                         | 0.16                          |
| 50                                    | 1.70                                                   | 21.4                         | 0.72                         | 0.28                          |
| 30                                    | 1.48                                                   | 21.9                         | 0.61                         | 0.39                          |
| 20                                    | 1.30                                                   | 22.3                         | 0.51                         | 0.49                          |
| 10                                    | 1.00                                                   | 22.9                         | 0.34                         | 0.66                          |
| 1                                     | 0.00                                                   | 25.0                         | 0.05                         | 0.95                          |

**Table S3.** Comparison of AMS OA concentration and total targeted gas-phase  $\text{C}_x\text{H}_y$ ,  $\text{C}_x\text{H}_y\text{O}_1$ ,  $\text{C}_x\text{H}_y\text{S}_1$  compound concentration, shown as a difference between screens 1 and 2, by concentration and by concentration ratio to carbon monoxide concentration.

| Screen 1→2                                                                                                                            | Concentration<br>difference   | Ratio of concentration difference to<br>CO concentration difference |
|---------------------------------------------------------------------------------------------------------------------------------------|-------------------------------|---------------------------------------------------------------------|
| AMS OA                                                                                                                                | -2.3 $\mu\text{g}/\text{m}^3$ | -0.0044 (7% decrease)                                               |
| $\Sigma(\text{C}_x\text{H}_y, \text{C}_x\text{H}_y\text{O}_1, \text{C}_x\text{H}_y\text{S}_1)$ from<br>targeted adsorbent tube search | +7.0 $\mu\text{g}/\text{m}^3$ | +0.022 (55% increase)                                               |

## References

- Akagi, S. K., Yokelson, R. J., Wiedinmyer, C., Alvarado, M. J., Reid, J. S., Karl, T., Crounse, J. D. and Wennberg, P. O.: Emission factors for open and domestic biomass burning for use in atmospheric models, *Atmos. Chem. Phys.*, 11(9), 4039–4072, doi:10.5194/acp-11-4039-2011, 2011.
- Andreae, M. O.: Emission of trace gases and aerosols from biomass burning – An updated assessment, *Atmos. Chem. Phys.*, 1–27, doi:10.5194/acp-2019-303, 2019.
- Barnes, I., Hjorth, J. and Mihalapoulos, N.: Dimethyl sulfide and dimethyl sulfoxide and their oxidation in the atmosphere, *Chem. Rev.*, 106(3), 940–975, doi:10.1021/cr020529+, 2006.
- Corrigan, A. L., Russell, L. M., Takahama, S., Äijälä, M., Ehn, M., Junninen, H., Rinne, J., Petäjä, T., Kulmala, M., Vogel, A. L., Hoffmann, T., Ebben, C. J., Geiger, F. M., Chhabra, P., Seinfeld, J. H., Worsnop, D. R., Song, W., Auld, J. and Williams, J.: Biogenic and biomass burning organic aerosol in a boreal forest at Hyytiälä, Finland, during HUMPPA-COPEC 2010, *Atmos. Chem. Phys.*, 13(24), 12233–12256, doi:10.5194/acp-13-12233-2013, 2013.
- Ditto, J. C., Barnes, E. B., Khare, P., Takeuchi, M., Joo, T., Bui, A. A. T., Lee-Taylor, J., Eris, G., Chen, Y., Aumont, B., Jimenez, J. L., Ng, N. L., Griffin, R. J. and Gentner, D. R.: An omnipresent diversity and variability in the chemical composition of atmospheric functionalized organic aerosol, *Commun. Chem.*, 1(1), 75, doi:10.1038/s42004-018-0074-3, 2018.
- Ditto, J. C., Joo, T., Khare, P., Sheu, R., Takeuchi, M., Chen, Y., Xu, W., Bui, A. A. T., Sun, Y., Ng, N. L. and Gentner, D. R.: Effects of Molecular-Level Compositional Variability in

452 Organic Aerosol on Phase State and Thermodynamic Mixing Behavior, *Environ. Sci.*  
 453 *Technol.*, 53, 13009–13018, doi:10.1021/acs.est.9b02664, 2019.  
 454 Ditto, J. C., Joo, T., Slade, J. H., Shepson, P. B., Ng, N. L. and Gentner, D. R.: Nontargeted  
 455 Tandem Mass Spectrometry Analysis Reveals Diversity and Variability in Aerosol  
 456 Functional Groups across Multiple Sites, Seasons, and Times of Day, *Environ. Sci.*  
 457 *Technol. Lett.*, 7(2), 60–69, doi:10.1021/acs.estlett.9b00702, 2020.  
 458 Donahue, N. M., Robinson, A. L. and Pandis, S. N.: Atmospheric organic particulate matter:  
 459 From smoke to secondary organic aerosol, *Atmos. Environ.*, 43(1), 94–106,  
 460 doi:10.1016/j.atmosenv.2008.09.055, 2009.  
 461 Donahue, N. M., Epstein, S. A., Pandis, S. N. and Robinson, A. L.: A two-dimensional volatility  
 462 basis set: 1. organic-aerosol mixing thermodynamics, *Atmos. Chem. Phys.*, 11(7), 3303–  
 463 3318, doi:10.5194/acp-11-3303-2011, 2011.  
 464 Gilman, J. B., Lerner, B. M., Kuster, W. C., Goldan, P. D., Warneke, C., Veres, P. R., Roberts, J.  
 465 M., De Gouw, J. A., Burling, I. R. and Yokelson, R. J.: Biomass burning emissions and  
 466 potential air quality impacts of volatile organic compounds and other trace gases from  
 467 fuels common in the US, *Atmos. Chem. Phys.*, 15(24), 13915–13938, doi:10.5194/acp-  
 468 15-13915-2015, 2015.  
 469 Hatch, L. E., Luo, W., Pankow, J. F., Yokelson, R. J., Stockwell, C. E. and Barsanti, K. C.:  
 470 Identification and quantification of gaseous organic compounds emitted from biomass  
 471 burning using two-dimensional gas chromatography-time-of-flight mass spectrometry,  
 472 *Atmos. Chem. Phys.*, 15(4), 1865–1899, doi:10.5194/acp-15-1865-2015, 2015.  
 473 Jencks, W. P. and Lienhard, G. E.: Thiol Addition to the Carbonyl Group. Equilibria and  
 474 Kinetics, *J. Am. Chem. Soc.*, 88(17), 3982–3995, doi:10.1021/ja00969a017, 1966.



475 Khare, P., Marcotte, A., Sheu, R., Walsh, A. N., Ditto, J. C. and Gentner, D. R.: Advances in  
 476 offline approaches for trace measurements of complex organic compound mixtures via  
 477 soft ionization and high-resolution tandem mass spectrometry, *J. Chromatogr. A*, 1598,  
 478 163–174, doi:10.1016/j.chroma.2019.03.037, 2019.

479 Koss, A. R., Sekimoto, K., Gilman, J. B., Selimovic, V., Coggon, M. M., Zarzana, K. J., Yuan,  
 480 B., Lerner, B. M., Brown, S. S., Jimenez, J. L., Krechmer, J., Roberts, J. M., Warneke,  
 481 C., Yokelson, R. J. and De Gouw, J.: Non-methane organic gas emissions from biomass  
 482 burning: Identification, quantification, and emission factors from PTR-ToF during the  
 483 FIREX 2016 laboratory experiment, *Atmos. Chem. Phys.*, 18(5), 3299–3319,  
 484 doi:10.5194/acp-18-3299-2018, 2018.

485 Kroll, J. H., Donahue, N. M., Jimenez, J. L., Kessler, S. H., Canagaratna, M. R., Wilson, K. R.,  
 486 Altieri, K. E., Mazzoleni, L. R., Wozniak, A. S., Bluhm, H., Mysak, E. R., Smith, J. D.,  
 487 Kolb, C. E. and Worsnop, D. R.: Carbon oxidation state as a metric for describing the  
 488 chemistry of atmospheric organic aerosol., *Nat. Chem.*, 3(2), 133–139,  
 489 doi:10.1038/nchem.948, 2011.

490 Li, S. M., Leithead, A., Moussa, S. G., Liggio, J., Moran, M. D., Wang, D., Hayden, K.,  
 491 Darlington, A., Gordon, M., Staebler, R., Makar, P. A., Stroud, C. A., McLaren, R., Liu,  
 492 P. S. K., O'Brien, J., Mittermeier, R. L., Zhang, J., Marson, G., Cober, S. G., Wolde, M.  
 493 and Wentzell, J. J. B.: Differences between measured and reported volatile organic  
 494 compound emissions from oil sands facilities in Alberta, Canada, *Proc. Natl. Acad. Sci.*  
 495 *U. S. A.*, 114(19), E3756–E3765, doi:10.1073/pnas.1617862114, 2017.

496 Li, Y., Pöschl, U. and Shiraiwa, M.: Molecular corridors and parameterizations of volatility in  
 497 the chemical evolution of organic aerosols, *Atmos. Chem. Phys.*, 16(5), 3327–3344,

doi:10.5194/acp-16-3327-2016, 2016.

Lowe, A. B.: Thiol-ene “click” reactions and recent applications in polymer and materials synthesis, *Polym. Chem.*, 1(1), 17–36, doi:10.1039/b9py00216b, 2010.

Mashkina, A. V.: Catalytic Synthesis Of Sulfides Sulfoxides and Sulfones, *Sulfur reports*, 10(4), 279–388, doi:10.1080/01961779108048759, 1991.

Ng, N. L., Kwan, A. J., Surratt, J. D., Chan, A. W. H., Chhabra, P. S., Sorooshian, A., Pye, H. O. T., Crounse, J. D., Wennberg, P. O., Flagan, R. C. and Seinfeld, J. H.: Secondary organic aerosol (SOA) formation from reaction of isoprene with nitrate radicals (NO<sub>3</sub>), *Atmos. Chem. Phys.*, 8, 4117–4140, 2008.

Ochiai, N., Tsunokawa, J., Sasamoto, K. and Hoffmann, A.: Multi-volatile method for aroma analysis using sequential dynamic headspace sampling with an application to brewed coffee, *J. Chromatogr. A*, 1371, 65–73, doi:10.1016/j.chroma.2014.10.074, 2014.

Pudenzi, M. A. and Eberlin, M. N.: Assessing Relative Electrospray Ionization, Atmospheric Pressure Photoionization, Atmospheric Pressure Chemical Ionization, and Atmospheric Pressure Photo- and Chemical Ionization Efficiencies in Mass Spectrometry Petroleomic Analysis via Pools and Pairs, *Energy and Fuels*, 30(9), 7125–7133, doi:10.1021/acs.energyfuels.6b01403, 2016.

Riva, M., Barbosa, T. D. S., Lin, Y., Stone, E. A. and Gold, A.: Characterization of organosulfates in secondary organic aerosol derived from the photooxidation of long-chain alkanes, *Atmos. Chem. Phys.*, 16, 11001–11018, doi:10.5194/acp-2016-20, 2016a.

Riva, M., Budisulistiorini, S. H., Chen, Y., Zhang, Z., D’Ambro, E. L., Zhang, X., Gold, A., Turpin, B. J., Thornton, J. A., Canagaratna, M. R. and Surratt, J. D.: Chemical Characterization of Secondary Organic Aerosol from Oxidation of Isoprene

521 Hydroxyhydroperoxides, *Environ. Sci. Technol.*, 50, 9889–9899,  
 522 doi:10.1021/acs.est.6b02511, 2016b.

523 Schauer, J. J., Kleeman, M. J., Cass, G. R. and Simoneit, B. R. T.: Measurement of emissions  
 524 from air pollution sources. 3. C1-C29 organic compounds from fireplace combustion of  
 525 wood, *Environ. Sci. Technol.*, 35(9), 1716–1728, doi:10.1021/es001331e, 2001.

526 Sheu, R., Marcotte, A., Khare, P., Charan, S., Ditto, J. C. and Gentner, D. R.: Advances in  
 527 offline approaches for chemically speciated measurements of trace gas-phase organic  
 528 compounds via adsorbent tubes in an integrated sampling-to-analysis system, *J.*  
 529 *Chromatogr. A*, 1575, 80–90, doi:10.1016/j.chroma.2018.09.014, 2018.

530 Simoneit, B. R. T., Rogge, W. F., Mazurek, M. A., Standley, L. J., Hildemann, L. M. and Cass,  
 531 G. R.: Lignin Pyrolysis Products, Lignans, and Resin Acids as Specific Tracers of Plant  
 532 Classes in Emissions from Biomass Combustion, *Environ. Sci. Technol.*, 27(12), 2533–  
 533 2541, doi:10.1021/es00048a034, 1993.

534 Surratt, J. D., Gomez-Gonzalez, Y., Chan, A. W. H., Vermeylen, R., Shahgholi, M., Kleindienst,  
 535 T. E., Edney, E. O., Offenberg, J. H., Lewandowski, M., Jaoui, M., Maenhaut, W.,  
 536 Claeys, M., Flagan, R. C. and Seinfeld, J. H.: Organosulfate Formation in Biogenic  
 537 Secondary Organic Aerosol, *J. Phys. Chem. A*, 112, 8345–8378, 2008.

538 Worton, D. R., Zhang, H., Isaacman-Vanwertz, G., Chan, A. W. H., Wilson, K. R. and  
 539 Goldstein, A. H.: Comprehensive Chemical Characterization of Hydrocarbons in NIST  
 540 Standard Reference Material 2779 Gulf of Mexico Crude Oil, *Environ. Sci. Technol.*,  
 541 49(22), 13130–13138, doi:10.1021/acs.est.5b03472, 2015.

542 Zhou, S., Collier, S., Jaffe, D. A., Briggs, N. L., Hee, J., Iii, A. J. S., Kleinman, L., Onasch, T. B.  
 543 and Zhang, Q.: Regional influence of wildfires on aerosol chemistry in the western US

544 and insights into atmospheric aging of biomass burning organic aerosol, *Atmos. Chem.*  
545 *Phys.*, 17(3), 2477–2493, doi:10.5194/acp-17-2477-2017, 2017.  
546
